# Supplementary material for: Acute Headache Management for Patients with Subarachnoid Hemorrhage: An International Survey of Healthcare Providers
Source: Research Square preprint supplement (doi:10.21203/rs.3.rs-1719540/v3), 2022-06-14
Supplement: Supplementary file 1 [file cf82f8ae6a4acfd39485609c.docx]

**Supplemental Table 3. Perceived most effective medication by primary specialty**

|  | **Perceived most effective medication (n [%])** | | | | | | | | | |
| --- | --- | --- | --- | --- | --- | --- | --- | --- | --- | --- |
| **Primary specialty** | APAP | butalbital | gabapentinoids | multimodal | NSAIDs | opioid+opioid combination | steroid+steroid combination | supportive | none | other |
| Anesthesiology | 5 (6.6) | 0 (0.0%) | 0 (0.0%) | 6 (7.9) | 11 (14.5) | 35 (46.1%) | 6 (7.9) | 4 (5.3) | 2 (2.6) | 7 (9.2) |
| Intensive Care Medicine | 6 (5.3) | 8 (7.0%) | 2 (1.8%) | 6 (5.3) | 12 (10.5) | 52 (45.6%) | 7 (6.1) | 4 (3.5) | 2 (1.8) | 15 (13.2) |
| Neurology | 1 (0.8) | 0 (0.0%) | 6 (4.7%) | 5 (3.9) | 10 (7.9) | 31 (24.4%) | 41 (32.3) | 5 (3.9) | 5 (3.9) | 23 (18.1) |
| Neurosurgery | 0 (0.0) | 4 (18.2) | 0 (0.0) | 0 (0.0) | 2 (9.1) | 6 (27.3) | 5 (22.7) | 0 (0.0%) | 0 (0) | 5 (22.7) |
| Other | 1 (2.7) | 1 (2.7) | 2 (5.4) | 4 (10.8) | 0 (0) | 18 (48.6) | 6 (16.2) | 2 (5.4%) | 1 (2.7) | 2 (5.4) |
| P value (Fisher's exact test): p=0.0005  APAP, acetaminophen; NSAIDs, nonsteroidal anti-inflammatory drugs | | | | | | | | | | |
